# Supplementary material
Source: HighWire-hosted journal article supplement (https://ez-admanager.com/highwire/filestream/156267/field_highwire_adjunct_files/0/harden_1674.pdf)
Supplement: harden_1674.pdf [file harden_1674.pdf]

# Resumen de guía de práctica clínica: Tasas de incidencia y factores de riesgo de muerte súbita inesperada en epilepsia

Reporte del Subcomité de Desarrollo, Diseminación e Implementación de Guías de la *American Academy of Neurology* y de la *American Society of Epilepsy*

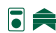

Cynthia Harden, MD  
Torbjörn Tomson, MD,  
PhD

David Gloss, MD,  
MPH&TM

Jeffrey Buchhalter, MD,  
PhD

J. Helen Cross, MB,  
ChB, PhD

Elizabeth Donner, MD  
Jacqueline A. French,  
MD

Anthony Gil-Nagel, MD,  
PhD

Dale C. Hesdorffer, PhD  
W. Henry Smithson,  
MB, ChB, MD

Mark C. Spitz, MD  
Thaddeus S. Walczak,  
MD

Josemir W. Sander, MD,  
PhD, FRCP

Philippe Ryvlin, MD,  
PhD

## RESUMEN

**Objetivo:** Determinar las tasas de incidencia de muerte súbita inesperada en epilepsia (SUDEP, *sudden unexpected death in epilepsy*) en diferentes poblaciones con epilepsia y responder la pregunta de si se han identificado factores de riesgo para SUDEP.

**Métodos:** Revisión sistemática de la evidencia; Evaluación del Grado de Recomendaciones modificada, Desarrollo y proceso de Evaluación para desarrollar conclusiones; recomendaciones desarrolladas por consenso.

**Resultados:** Los hallazgos para las tasas de incidencia basadas en 12 estudios Clase I fueron los siguientes: el riesgo de SUDEP en niños con epilepsia (edad 0-17 años) es 0,22/1000 pacientes-años (intervalo de confianza [IC] 95% 0,16-0,31) (confianza moderada en la evidencia). El riesgo de SUDEP aumenta en adultos a 1,2/1000 pacientes-años (IC 95% 0,64-2,32) (baja confianza en la evidencia). El mayor factor de riesgo para SUDEP es la ocurrencia de crisis tónico-clónicas generalizadas (CTCG); el riesgo de SUDEP aumenta en asociación con una frecuencia aumentada de CTCG (elevada confianza en la evidencia).

**Recomendaciones:** Nivel B: Los clínicos a cargo de niños pequeños con epilepsia deberían informar a los padres/cuidadores que en 1 año el SUDEP afecta típicamente a 1 de 4500 niños; por lo tanto, 4499 niños de 4500 no estarán afectados. Los clínicos deberían informar a los pacientes adultos con epilepsia que el SUDEP afecta típicamente a 1 de 1000 adultos con epilepsia al año; por lo tanto, anualmente 999 adultos de 1000 no estarán afectados. Para personas con epilepsia que continúan experimentando CTCG, los clínicos deberían continuar modificando activamente las terapias anti-epilépticas para reducir las crisis y el riesgo de SUDEP, incorporando a la vez las preferencias del paciente y haciendo un balance de los riesgos y beneficios de cualquier nuevo enfoque. Los clínicos deberían informar a las personas con epilepsia que la ausencia de crisis, particularmente de CTCG, está fuertemente asociada con una reducción en el riesgo de SUDEP. **Neurology® 2017;88:1674–1680**

## GLOSARIO

**AAN** = *American Academy of Neurology* (Academia Americana de Neurología); **CTCG** = crisis tónico-clónica generalizada; **DAE** = droga anti-epiléptica; **IC** = intervalo de confianza; **SUDEP** = *sudden unexpected death in epilepsy* (muerte súbita inesperada en epilepsia).

Este documento resume información aportada en la guía completa, disponible en [Neurology.org](http://Neurology.org). Appendix e-6, citado en la guía total (suplemento de datos), disponible en [Neurology.org](http://Neurology.org).

La muerte súbita inesperada en epilepsia (SUDEP) es un riesgo poco comprendido y

catastrófico de la epilepsia. La naturaleza sensible de las discusiones de este riesgo infrecuente –pero importante– con los pacientes y sus familias ha generado la necesidad de obtener información basada en evidencia de la SUDEP. El objetivo de esta guía de práctica clínica es

## Datos suplementarios en [Neurology.org](http://Neurology.org)

Del Department of Neurology (C.H.), Mount Sinai Health System, New York, NY; Department of Clinical Neuroscience (T.T.), Karolinska Institutet, Stockholm, Sweden; Department of Neurology (D.G.), CAMC Physicians, Charleston, WV; Departments of Pediatrics and Clinical Neurosciences (J.B.), Alberta Children's Hospital, University of Calgary, Canada; Department of Clinical Neurosciences, Institute of Child Health (J.H.C.), and Institute of Neurology (J.W.S.), University College London; Great Ormond Street Hospital for Children NHS Foundation Trust (J.H.C.), London, UK; Department of Paediatrics (E.D.), Division of Neurology, The Hospital for Sick Children, University of Toronto, Canada; Department of Neurology (J.A.F.), New York University Langone Comprehensive Epilepsy Center, New York; Department of Neurology (A.G.-N.), Hospital Ruber Internacional, Madrid, Spain; Gertrude H. Sergievsky Center and Department of Epidemiology (D.C.H.), Columbia University Medical Center, New York, NY; Department of General Practice (W.H.S.), University College Cork, Ireland; Anschutz Outpatient Pavilion (M.C.S.), University of Colorado Health, Aurora; Neurology Clinic (T.S.W.), University of Minnesota, Minneapolis; Stichting Epilepsie Instellingen Nederland (SEIN) (J.W.S.), Heemstede, the Netherlands; and the Department of Clinical Neurosciences (P.R.), CHUV, Lausanne, Switzerland.

Aprobado por el Subcomité de Desarrollo, Diseminación e Implementación de Guías el 7 de noviembre de 2015; por el AAN Practice Committee el 17 de enero de 2016; por el AES Guidelines Committee el 11 de noviembre de 2016; por el AES Council on Clinical Activities el 11 de noviembre de 2016; por el AES Executive Committee el 14 de noviembre de 2016; por el AES Board of Directors el 30 de noviembre de 2016; y por el AAN Institute Board of Directors el 11 de enero de 2017. Esta guía de práctica clínica fue endosada por la International Child Neurology Association el 27 de agosto de 2016.

Ir a [Neurology.org](http://Neurology.org) para declaraciones de intereses completas. La información sobre fondos y aquellas declaraciones relevantes para los autores, si existiesen, se encuentran al final del artículo.

examinar la evidencia sobre la tasa de incidencia de SUDEP en poblaciones con epilepsia y sobre factores pronósticos para la ocurrencia de SUDEP. Esto a cambio nos proporcionará una discusión honesta y balanceada cuando los clínicos aconsejan a la gente sobre SUDEP, y aportará conocimientos hacia áreas en las cuales se necesita más investigación clínica.

Se realizaron dos preguntas:

1. ¿Cuál es la tasa de incidencia de SUDEP en diferentes poblaciones con epilepsia?
2. ¿Hay factores de riesgo específicos para SUDEP?

**DESCRIPCIÓN DEL PROCESO ANALÍTICO** Esta guía de práctica clínica en general sigue el proceso delineado en el manual del proceso de desarrollo de guías de la *American Academy of Neurology* (AAN) de 2004,<sup>1</sup> con la excepción de los procesos para la formulación de conclusiones y recomendaciones, que siguen los procesos explicados en el manual del proceso de desarrollo de guías de la AAN de 2011.<sup>2</sup>

En 2010, el Subcomité de Desarrollo, Diseminación e Implementación de Guías de la AAN y el Subcomité de Guías de la *American Society of Epilepsy* convocaron un panel de expertos para desarrollar esta guía de práctica clínica. El panel de la guía convocó a un bibliotecario médico independiente para buscar en las bases de datos MEDLINE y Embase desde el artículo más antiguo hasta noviembre de 2010. El panel luego realizó una búsqueda idéntica en abril de 2015 para incluir artículos publicados desde noviembre de 2010. Las palabras clave para ambas búsquedas fueron SUDEP o (*sudden* y [*unexplained* o *unexpected*] y *death*) combinadas con los subtítulos médicos tradicionales (MeSH) para epilepsia (*epilepsy/abnormalities* o *epilepsy/classification* o *epilepsy/complications* o *epilepsy/drug effects* o *epilepsy/drug therapy* o *epilepsy/epidemiology* o *epilepsy/etnia* o *epilepsy/etiology* o *epilepsy/genetics* o *epilepsy/mortality* o *epilepsy/physiopathology* o *epilepsy/prevention* y *control* o *epilepsy/therapy*) con límites de humanos, más todos los niños: 0-18 años o todos los adultos: 19+ años. Los tipos de literatura estuvieron limitados a ensayo clínico; ensayo aleatorizado controlado; estudio comparativo; ensayo clínico controlado; estudios de evaluación; artículo de revista; estudio multicéntrico; apoyo de investigación; apoyo de investigación, extramural, del NIH; apoyo de investigación, intramural, del NIH; apoyo de investigación, *non-US gov't*; apoyo de investigación, *non PHS, US gov't*; o estudios de validación, *US gov't, PHS*. Finalmente, el panel de la guía específicamente buscó causas implicadas en el SUDEP (por ej., arritmias cardíacas y disfunción autonómica pre-ictal), donde fueron testeadas las hipótesis.

Esta búsqueda encontró 1068 resúmenes, los cuales fueron revisados para saber su relevancia por al menos 2 miembros del panel trabajando independientemente uno de otro; 744 resúmenes no fueron relevantes en el aporte de respuestas a las preguntas. De los restantes 324 resúmenes, 2 miembros del panel obtuvieron luego los artículos completos y los revisaron de forma independiente para su inclusión. Los artículos revisados fueron ingresados en una aplicación para bases de datos a través de un cuestionario *online*. Setenta artículos tuvieron datos para su inclusión, y 254 fueron excluidos porque fallaron al responder las preguntas, usaban una definición inadecuada de SUDEP, o usaban una comparación inapropiada de los grupos de epilepsia en los estudios pronósticos. La literatura disponible consistió en múltiples artículos Clase I para incidencia, y por lo tanto los artículos ranqueados como Clase II o menos fueron excluidos debido a que las publicaciones Clase II no incluían poblaciones abarcadas por los artículos Clase I. Varios estudios Clase I y múltiples Clase II estuvieron disponibles para las preguntas pronósticas.

Se requirió que los artículos incluidos especificaran el uso de la definición de SUDEP aportada por Nashef,<sup>3</sup> Annegers<sup>4</sup> y Leestma et al.<sup>5</sup> o describieran criterios en concordancia con estas definiciones. Estas definiciones compartían los siguientes criterios, y el panel de la guía incluyó cualquier artículo que incorporase estos criterios en su definición de SUDEP: (1) el paciente tenía epilepsia de acuerdo con criterios razonables sin hacer referencia a los criterios utilizados para la epilepsia; (2) fueron excluidas las muertes por ahogamiento, trauma o status epiléptico; (3) la muerte pudo haber ocurrido luego de una crisis con testigos; (4) otras causas de muerte fueron excluidas.

El panel de la guía utilizó 2 de los sistemas de la AAN basados en evidencia para ranquear artículos: los criterios de *screening* para la pregunta de la incidencia y los criterios pronósticos para la pregunta del factor de riesgo.

**Pregunta 1: ¿Cuál es la incidencia de SUDEP en diferentes poblaciones con epilepsia?** Doce estudios Clase I aportaron datos de tasas de incidencia.<sup>6-17</sup> La imprecisión en los hallazgos de los estudios resultó en una confianza moderada en la evidencia para las tasas de SUDEP en la infancia y una confianza baja en la eviden-

**Tabla 1** Conclusiones sobre la incidencia de muerte súbita inesperada en epilepsia (SUDEP)

| Población | SUDEP/1000 pacientes-años (intervalo de confianza) | Confianza |
|-----------|----------------------------------------------------|-----------|
| Global    | 0,58 (0,31-1,08)                                   | Baja      |
| Infancia  | 0,22 (0,16-0,31)                                   | Moderada  |
| Adulthood | 1,2 (0,64-2,32)                                    | Baja      |

cia para las tasas de SUDEP en adultos y tasas globales (tabla 1). Debido a la imprecisión en los resultados de los estudios de incidencia con una falta de solapamiento en los intervalos de confianza (IC) de 95% entre varias poblaciones de estudio comparables, el panel de la guía realizó un meta-análisis de efectos aleatorios para aportar un resumen de las mediciones del riesgo absoluto o relativo de SUDEP. Además, para explorar las razones de la heterogeneidad en el riesgo absoluto de SUDEP reportado, el panel condujo un meta-análisis de subgrupos de estudios incluyendo diferentes grupos de pacientes con epilepsia (por ej., niños vs adultos). Estos meta-análisis tienen una heterogeneidad significativa inexplicable, que puede sugerir la presencia de otros factores de riesgo desconocidos o inexplorados.

**Razones para las recomendaciones 1 y 2.** Nuestra revisión sistemática encontró que el riesgo de SUDEP en niños con epilepsia es 0,22/1000 pacientes-años (IC 95% 0,16-0,31). El riesgo de SUDEP aumenta en adultos a 1,2/1000 pacientes-años (IC 0,64-2,32). Hay una considerable incertidumbre respecto a los riesgos estimados en adultos.

Las personas con epilepsia y sus familias prefieren ser informados sobre el riesgo individual para un evento catastrófico como SUDEP, incluso cuando la probabilidad del evento es baja.<sup>18</sup> Esta preferencia está sujeta a influencias culturales. Luego de ser informadas de un evento adverso, las personas comúnmente sobreestiman el riesgo de que ese evento les suceda a ellos.<sup>19</sup> Dicha sobreestimación aumenta excesivamente la ansiedad en relación con un evento adverso. La sobreestimación puede ser reducida presentando el riesgo como la probabilidad tanto de tener como de no tener el evento,<sup>20</sup> y utilizando números además de palabras<sup>19</sup> y frecuencias más que porcentajes, para transmitir el riesgo.<sup>21</sup>

**Recomendación de incidencia 1: incidencia de SUDEP en niños.** Los clínicos a cargo de niños con epilepsia deberían informar a los padres o guardianes que (Nivel B para lo siguiente):

1. Hay un riesgo bajo de SUDEP.
2. En 1 año, la SUDEP afecta típicamente a 1 de 4500 niños con epilepsia; en otras palabras, anualmente 4499 niños de 4500 no estarán afectados por SUDEP.

**Recomendación de incidencia 2: incidencia de SUDEP en adultos.** Los clínicos deberían informar a los adultos con epilepsia que (Nivel B para lo siguiente):

1. Hay un riesgo bajo de SUDEP.
2. En 1 año, la SUDEP afecta típicamente a 1 de 1000 adultos con epilepsia; en otras palabras, anualmente 999 adultos de 1000 no estarán afectados por SUDEP.

**Pregunta 2: ¿Hay factores de riesgo para SUDEP?** Seis artículos Clase I<sup>14,22-26</sup> y 16 Clase II<sup>6,7,17,23,27-38</sup> aportaron evidencia para esta pregunta. La tabla 2 resume los resultados.

**Razones para la recomendación 3.** Nuestra revisión sistemática encontró que la presencia y frecuencia de crisis tónico-clónicas generalizadas (CTCG) son un riesgo mayor para SUDEP. Por ejemplo, personas con 3 o más CTCG al año tienen un riesgo de SUDEP 15 veces mayor. Este riesgo relativo aumentado se traduce a un riesgo absoluto de hasta 18 muertes por 1000 pacientes-años para personas con CTCG frecuentes.<sup>29</sup>

El aumento grande de riesgo de SUDEP por CTCG, junto a la evidencia de unidades de monitoreo de epilepsia<sup>39</sup> que demuestra que una CTCG fue siempre el evento precipitante de SUDEP, sugiere fuertemente que las CTCG no están solamente asociadas al SUDEP, sino más bien están relacionadas causalmente con SUDEP. A partir de esto, es razonable inferir que la mejoría en el control de las CTCG en un individuo resultará en un riesgo reducido de SUDEP. Por lo tanto, la reducción en el riesgo de SUDEP es un beneficio adicional a los muchos beneficios resultantes de una mejoría en el control de crisis.

Como con todos los beneficios asociados con un mejor control de crisis, el beneficio potencial de la reducción de riesgo de SUDEP necesita ser balanceado con los riesgos y cargas asociados a las terapias anticrisis.

**Recomendación 3.** Para personas con epilepsia que continúan experimentando CTCG, los clínicos deberían continuar modificando activamente las terapias para la epilepsia para reducir la ocurrencia de crisis y el riesgo de SUDEP, incorporando las preferencias de los pacientes y sopesando los riesgos y beneficios de cualquier nuevo enfoque (Nivel B).

**Razones para la recomendación 4.** Las CTCG son un factor de riesgo claro para SUDEP, y las crisis nocturnas también pueden aumentar el

**Tabla 2 Conclusiones sobre los factores de riesgo para muerte súbita inesperada en epilepsia (SUDEP)**

| Factor                                                               | OR (IC)                                                                                 | Nivel de confianza |
|----------------------------------------------------------------------|-----------------------------------------------------------------------------------------|--------------------|
| Presencia de CTCG vs ausencia de CTCG                                | 10 (17-14)                                                                              | Moderado           |
| Frecuencia de CTCG                                                   | OR 5,07 (2,94-8,76) para 1-2 CTCG por año y OR 15,46 (9,92-24,10) para > 3 CTCG por año | Alto               |
| No estar libre de crisis por 1.5 años                                | 4,7 (1,4-16)                                                                            | Moderado           |
| No agregar una DAE cuando los pacientes son médicamente refractarios | 6 (2-20)                                                                                | Moderado           |
| Supervisión nocturna (reducción del riesgo)                          | 0,4 (0,2-0,8)                                                                           | Moderado           |
| Uso de un artefacto de escucha nocturno (reducción del riesgo)       | 0,1 (0-0,3)                                                                             | Moderado           |

Abreviaturas: CTCG = crisis tónico-clónica generalizada; DAE = droga antiepileptica; IC = intervalo de confianza; OR = odds ratio.

riesgo. Estos hallazgos, en conjunto con la observación de que la depresión respiratoria post-ictal es un mecanismo mayor de SUDEP,<sup>39</sup> sugieren que las crisis nocturnas sin testigos y la depresión respiratoria post-ictal pueden causar SUDEP.

Más aún, la presencia en la habitación de otro individuo de al menos 10 años de edad y de inteligencia normal está asociada con un riesgo reducido de SUDEP. Estos resultados implican que un observador en la habitación podría detectar las crisis, chequear al paciente y aportar estimulación suficiente para prevenir un paro respiratorio. Esta asociación no indica que estas intervenciones mitiguen directamente los mecanismos que causan SUDEP.

Si estuviesen de acuerdo con las circunstancias y valores del paciente y su familia, la supervisión nocturna podría reducir el riesgo de SUDEP; sin embargo, indicar una observación durante la noche podría ser muy difícil e intrusivo.

**Recomendación 4.** Para personas con CTCG frecuentes y crisis nocturnas, los clínicos pueden aconsejar a pacientes y familias seleccionadas, si se permite por su epilepsia individualizada y las circunstancias psicosociales, utilizar supervisión nocturna u otras precauciones nocturnas, como el uso de un dispositivo de escucha remoto, para reducir el riesgo de SUDEP (Nivel C).

**Razones para la recomendación 5.** Uno de los hallazgos más consistentes de esta revisión es que muchos factores que son indicadores de epilepsia no controlada, entre estos tener CTCG, tener CTCG frecuentes y la persistencia de crisis, están fuertemente asociados con SUDEP.

Usualmente, las personas con epilepsia y sus familias prefieren ser informados sobre los factores que están asociados con un riesgo aumentado de un evento catastrófico como la SUDEP. Los pacientes están especialmente interesados en factores que podrían reducir su riesgo, incluso aunque el nexo causal entre el factor y la reducción en el riesgo no ha sido establecido. El conocimiento sobre estos factores de riesgo podría sugerir comportamientos que podrían modificar los factores de riesgo (por ej., mejoría en la adherencia a la terapia<sup>40</sup>), aumentar la sensación de control de la persona y reducir la ansiedad que viene con el conocimiento del riesgo. No está probado que tipos de crisis menos severas, como las crisis focales o las crisis mioclónicas, estén asociadas con un aumento en el riesgo de SUDEP, pero los individuos que las tienen frecuentemente están en riesgo de CTCG en un escenario de mala adherencia al tratamiento. Por lo tanto, la adherencia a la terapia para mantenerse libre de CTCG es importante incluso cuando un individuo no esté experimentando este tipo severo de crisis.

**Recomendación 5.** Los clínicos deberían informar a los pacientes con epilepsia que la ausen-

cia de crisis, particularmente de CTCG (lo cual es más probable que ocurra con adherencia a la medicación), está fuertemente asociada con una reducción en el riesgo de SUDEP (Nivel B).

**Conclusiones adicionales (sin hacer recomendaciones).** La evidencia de que los siguientes factores estén asociados a una alteración en el riesgo de SUDEP es baja:

1. Crisis nocturnas (asociado a un riesgo incrementado)
2. Cualquier droga antiepiléptica específica (DAE) (ninguna asociada específicamente con un riesgo incrementado)
3. Uso de lamotrigina en mujeres (asociado a un riesgo incrementado)
4. Nunca haber sido tratado con una DAE (asociado a un riesgo incrementado)
5. Número de DAE utilizadas globalmente (asociado a un riesgo incrementado)
6. Variabilidad en la frecuencia cardíaca (no asociado a un riesgo incrementado)
7. Epilepsia extratemporal (asociado a un riesgo incrementado)
8. Discapacidad intelectual (asociado a un riesgo incrementado)
9. Sexo masculino (asociado a un riesgo incrementado)
10. Uso de drogas ansiolíticas (asociado a un riesgo incrementado)

La evidencia de que los siguientes factores estén asociados a una alteración en el riesgo de SUDEP es baja o conflictiva:

1. Frecuencia global de crisis evaluada utilizando todos los tipos de crisis
2. Epilepsia farmacológicamente refractaria vs no tener crisis bien controladas, definido como la ausencia de crisis en el último año
3. Monoterapia vs politerapia
4. Niveles de carbamazepina, fenitoína o valproato de sodio por encima, debajo o en el rango de referencia
5. Uso de drogas psicotrópicas
6. Trastornos de salud mental, trastornos respiratorios o uso de alcohol
7. Uso de lamotrigina en personas con epilepsia altamente refractaria
8. Cambios frecuentes en las DAE
9. Monitoreo de droga terapéutica
10. Sometimiento a un procedimiento de resección quirúrgica de epilepsia (aunque la investigación actual no descarta la posibilidad de un efecto beneficioso o, más aún, el efecto potencial de la cirugía de epilepsia en la reducción de la frecuencia de CTCG y la severidad de la epilepsia en la reducción del riesgo de SUDEP)
11. Resultado según la clasificación de Engel de

cirugía de epilepsia (aunque la investigación actual no descarta la posibilidad de un efecto beneficioso y, más aún, el efecto potencial de la cirugía de la epilepsia en la reducción de la frecuencia de CTCG y la severidad de la epilepsia en la reducción del riesgo de SUDEP)

12. Uso de estimulador vagal durante más de 2 años (sin embargo, la investigación actual no descarta la posibilidad de un efecto beneficioso y, más aún, el efecto potencial de la cirugía de la epilepsia en la reducción de la frecuencia de CTCG y la severidad de la epilepsia en la reducción del riesgo de SUDEP)
13. Etiología de la epilepsia, ya sea idiopática o asociada a una localización
14. Lesión estructural en la RM
15. Duración de la epilepsia
16. Edad de inicio de la epilepsia
17. Supresión post-ictal en el EEG

### SUGERENCIAS PARA INVESTIGACIONES FUTURAS

1. Deberían desarrollarse métodos sistemáticos para identificar y reportar la incidencia de SUDEP en diferentes poblaciones con epilepsia para poder obtener un mejor entendimiento de la incidencia y las causas de esta condición devastadora
2. Se necesitan esfuerzos en la educación para mejorar el conocimiento forense de SUDEP entre profesionales, como examinadores médicos, jueces de instrucción y patólogos, para ayudar a determinar y documentar en los certificados de defunción, la etiología en individuos y para poder mejorar el conocimiento global de esta condición
3. Debería apoyarse y estimularse la investigación para identificar factores de riesgo prevenibles, para que se realicen futuros ensayos clínicos para reducir la ocurrencia de SUDEP. De particular importancia es entender mejor: (1) la relación entre la naturaleza, la severidad y la duración de la epilepsia y la ocurrencia de SUDEP y (2) si los tratamientos actuales afectan el riesgo de desarrollar SUDEP.
4. Debido a (1) los riesgos identificados con CTCG frecuentes, (2) el hecho de que un estudio muestra que más eventos de SUDEP ocurren en el brazo de placebo de los ensayos, y (3) el riesgo aumentado de SUDEP, se deberían tener serias consideraciones para evitar asignar a placebo a personas con CTCG frecuentes durante largos períodos.

**RENUNCIA** Las guías de práctica clínica, los avisos de prácticas, las revisiones sistemáticas y otras guías publicadas por la *American Academy*

*of Neurology* y sus afiliados son evaluaciones de la información científica y clínica actual, aportados como un servicio a la educación. La información: (1) no debería ser considerada inclusiva de todos los tratamientos apropiados, métodos de cuidado o como una definición del estándar de cuidado; (2) no es continuamente actualizada y puede no reflejar la evidencia más reciente (puede emerger nueva evidencia en el tiempo entre el cual la información es desarrollada y publicada o leída); (3) se enfoca sólo en las preguntas específicamente identificadas; (4) no es un mandato para ningún curso de cuidado médico en particular; y (5) no intenta sustituir el juicio profesional individual del médico tratante, ya que la información no toma en cuenta la variación individual entre los pacientes. En todos los casos, el curso de acción seleccionado debería ser considerado solamente por el médico tratante en el contexto del tratamiento a un paciente individual. El uso de la información es voluntario. La AAN aporta esta información basada en “cómo es”, y no da garantías, expresadas o implicadas, en relación con la información. La AAN específicamente renuncia a cualquier garantía de mercantilismo o aptitud para un uso o propósito particular. La AAN no asume ninguna responsabilidad por cualquier injuria o daño a personas o propiedad que se origine o se relacione con el uso de esta información o por cualquier error u omisión.

**CONFLICTO DE INTERÉS** La *American Academy of Neurology* y la *American Epilepsy Society* están comprometidas a producir guías de práctica clínica independientes, críticas y veraces. Se hacen esfuerzos significativos para minimizar el potencial de que conflictos de intereses lleguen a influir en las recomendaciones de esta guía de práctica clínica. En lo posible, la AAN y la AES mantienen separados a aquellos que tengan un rédito monetario en el éxito o fracaso de los productos evaluados en las guías de práctica clínica y los desarrolladores de las guías de práctica clínica. Se obtuvieron formularios de conflictos de interés de todos los autores y fueron revisados por un comité de vigilancia previo al inicio del proyecto. La AAN y la AES limitan la participación de autores con conflictos de interés sustancial. La AAN y la AES prohíben la participación comercial o aporte de fondos para los proyectos de guías de práctica clínica. Los borradores de las guías de práctica clínica han sido revisados por al menos 3 comités de la AAN, al menos 1 comité de la AES, una red de neurólogos, revisores de *Neurology*<sup>®</sup>, y representantes de los campos relacionados. La Política de Conflictos de Intereses de Autores de Guías de la AAN puede verse en [aan.com](http://aan.com). Para acceder a la información completa sobre este proceso, acceda al manual del proceso de la AAN de 2004.<sup>1</sup>

## CONTRIBUCIONES DE LOS AUTORES

Dr Harden: concepto y diseño del estudio, adquisición de datos, análisis o interpretación de datos, borrador/ revisión del manuscrito, revisión crítica del manuscrito para contenido intelectual importante, supervisión del estudio. Dr. Tomson: concepto y diseño del estudio, adquisición de datos, análisis o interpretación de datos, borrador/ revisión del manuscrito, revisión crítica del manuscrito para contenido intelectual importante. Dr. Gloss: concepto y diseño del estudio, adquisición de datos, análisis o interpretación de datos, borrador/ revisión del manuscrito, revisión crítica del manuscrito para contenido intelectual importante. Dr. Buchhalter: concepto y diseño del estudio, adquisición de datos, análisis o interpretación de datos, borrador/ revisión del manuscrito, revisión crítica del manuscrito para contenido intelectual importante. Dr. Cross: concepto y diseño del estudio, adquisición de datos, análisis o interpretación de datos, borrador/ revisión del manuscrito, revisión crítica del manuscrito para contenido intelectual importante. Dr. Donner: concepto y diseño del estudio, adquisición de datos, análisis o interpretación de datos, borrador/ revisión del manuscrito, revisión crítica del manuscrito para contenido intelectual importante. Dr. French: análisis o interpretación de datos, borrador/ revisión del manuscrito para contenido intelectual importante. Dr. Gil-Nagel: concepto y diseño del estudio, adquisición de datos, análisis o interpretación de datos, borrador/ revisión del manuscrito, revisión crítica del manuscrito para contenido intelectual importante. Dr. Hesdorffer: concepto y diseño del estudio, adquisición de datos, análisis o interpretación de datos, borrador/ revisión del manuscrito, revisión crítica del manuscrito para contenido intelectual importante. Dr. Smithson: concepto y diseño del estudio, adquisición de datos, análisis o interpretación de datos, borrador/ revisión del manuscrito, revisión crítica del manuscrito para contenido intelectual importante. Dr. Spitz: concepto y diseño del estudio, adquisición de datos, análisis o interpretación de datos, borrador/ revisión del manuscrito, revisión crítica del manuscrito para contenido intelectual importante. Dr. Walczak: análisis o interpretación de datos, borrador/ revisión del manuscrito, revisión crítica del manuscrito para contenido intelectual importante. Dr. Sander: análisis o interpretación de datos, borrador/ revisión del manuscrito, revisión crítica del manuscrito para contenido intelectual importante. Dr. Rylvlin: análisis o interpretación de datos, borrador/ revisión del manuscrito, revisión crítica del manuscrito para contenido intelectual importante.

## FONDOS PARA EL ESTUDIO

Esta guía fue desarrollada con el apoyo financiero de la *American Academy of Neurology*. Los autores que fueron miembros del subcomité o metodologistas (C.H., D.G., J.A.F.) de la AAN fueron compensados por la AAN por gastos relacionados a viajes a las reuniones del subcomité, donde se revisaron los borradores de los manuscritos.

## DECLARACIÓN DE INTERESES

C. Harden ha recibido regalías de Wiley y UpToDate y ha servido como editor contribuyente para *Epilepsy Currents*. T. Tomson ha servido como editor asociado de *Epilepsia*; es miembro de las editoriales de *Epilepsy Research*, *Epileptic Disorders*, y el *European Journal of Clinical Pharmacology*; ha recibido honorarios de Sun Pharmaceuticals, UCB, Eisai y Bial; ha servido como miembro de un panel de expertos para la adjudicación de sudden unexpected death in epilepsy (SUDEP) en ensayos clínicos de lamotrigina, patrocinado por GlaxoSmithKline; y ha recibido apoyo para la investigación de UCB, GlaxoSmithKline, Bial, Eisai, Novartis, Stockholm County Council, y Citizens United in Research for Epilepsy (CURE). D. Gloss sirve como consultor de medicina basada en la evidencia para la *American Academy of Neurology* (AAN) y ha servido como editor

asociado (riesgo de sesgo de clasificación) para *Neurology*<sup>®</sup>. J. Buchhalter ha recibido fondos para viajar de la AAN; sirve en el comité editorial de *Pediatric Neurology* y *Epilepsy Currents*; ha servido como consultor de UCB, Upsher-Smith Laboratories y Eisai; y ha realizado procedimientos clínicos/imágenes relacionados al contenido de esta guía de práctica clínica, incluyendo EEG y video EEG (25%) y evaluación de cirugía de la epilepsia. J. Cross ha servido como miembro del comité editorial de *Developmental Medicine, Child Neurology*, y la *European Journal of Child Neurology*; tiene una patente para C10 en el tratamiento de epilepsia; ha recibido regalías por un capítulo sobre epilepsia infantil en *Brain Diseases of the Nervous System* y como editor de *Paediatric Epilepsy*; ha recibido apoyo para investigación de UK National Institute for Health and Research (NIHR), el European Framework FP7, la Charles Wolfson Foundation, Action Medical Research y Sparks; y se ha sentado como consejero para Vitaflo, Sanofi, Eisai, Viropharma y Zogenix, por lo cual se le paga a su departamento. E. Donner ha recibido apoyo para investigación de Canadian Institutes of Health Research, Dravet Canada y SUDEP Aware. J. French ha servido como consultor para Acorda, Biotie, Eisai Medical Research, GlaxoSmithKline, Impax, Johnson & Johnson, Lewis County General Hospital, Marinus, Novartis, Pfizer, Sunovion, SK Life Science, Supernus Pharmaceuticals, UCB, Upsher-Smith y Vertex; ha recibido becas de Eisai Medical Research, la US Epilepsy Research Foundation, el Epilepsy Study Consortium, el Epilepsy Therapy Project of the Epilepsy Foundation, Lundbeck, Pfizer y UCB; y es presidente del Epilepsy Study Consortium. Todas las consultas son realizadas de parte del Consortium, y son pagadas al Consortium. New York University recibe salario de apoyo del Consortium. A. Gil-Nagel ha recibido compensación personal de Bial, Eisai, GSD Pharma Consulting, UCB Pharma, y Pfizer; ha recibido fondos para viajar de Bial, Eisai y GlaxoSmithKline; ha servido como editor para *Seizure, Neurologia* y *Revista de Neurología*; ha servido como disertante para Bial, Eisai, GlaxoSmithKline y UCB Pharma; y asegura que la información que da a sus pacientes en su clínica de epilepsia puede estar influida por los resultados de esta guía de práctica clínica. D. Hesdorffer es miembro del SUDEP Institute y del Executive Committee of the North American SUDEP Registry; ha servido en comités científicos para Upsher-Smith y Acorda; ha servido como consultor para Cyberonics; ha recibido fondos para viajar de la International League Against Epilepsy; ha servido como editor asociado de *Epilepsia*; ha servido en la editorial de *Epilepsy and Behavior*; ha servido como editor contribuyente para *Epilepsy Currents*; y ha recibido fondos del NIH, los Centers for Disease Control and Prevention, el Epilepsy Consortium, el Patient Centered Outcome Research Institute, Finding a Cure for Epilepsy, The Epilepsy Study Consortium, y el Icahn School of Medicine at Mount Sinai (por trabajo de consultor en una beca de prevención de injuria). W. Smithson ha servido en el comité científico de Sanofi UK consensus guidelines on women with epilepsy; ha recibido fondos para viajar para el Partners Against Mortality in Epilepsy conference on SUDEP (Washington 2016), ha recibido regalías de Blackwell Publishing para el *ABC of Epilepsy*, ha recibido apoyo financiero en forma de fondos para la infraestructura de investigación en la práctica general del NIHR (UK), y ha servido como testigo experto para el Fatal Accident Inquiry Dundee 2012 (2 casos de SUDEP). M. Spitz ha recibido compensación personal y honorarios por servir en comité de UCB, ha recibido fondos para viajar de Cyberonics (para ver el sitio/fábrica), ha recibido apoyo financiero para US Department of Defense Study on closed head injury, y ha dado testimonio experto, preparado un *affidavit* para, y actuado como testigo o consultor en relación a procedimiento legal. T. Walczak sirve en el panel científico de búsqueda de incidencia de SUDEP en pacientes de seguimiento tratados con el NeuroPace RNS System. La compensación va directo a su departamento académico y no aumenta su salario. J. Sander tiene su base en la University College London/University

College London Hospitals, que recibe fondos del UK Department of Health's NIHR Biomedical Research Centres; ha servido en comités para UCB y Eisai; ha recibido honorarios como disertante de GlaxoSmithKline, Eisai, UCB, Lundbeck y Teva; sirve en el comité editorial de *Lancet Neurology*; y recibe apoyo de investigación del Dr. Marvin Weil Epilepsy Research Fund, la Epilepsy Society (UK), la Netherlands Epilepsy Fund, Eisai, GlaxoSmithKline, WHO y EUFP7. Su posición actual depende de la Epilepsy Society (UK). P. Ryvlin ha servido en el Scientific Advisory Committee for the annual meeting of the French League Against Epilepsy; ha recibido fondos para viajar y honorarios de GlaxoSmithKline, Eisai, Janssen Cilag Pty. Ltd., Cyberonics, Medtronic y UCB Pharma (para participar en comités o simposios apoyados por la industria); ha servido como editor de revista para *Epilepsia*, *Epilepsy Research*, *Epileptic Disorders*, y *Epilepsy Research and Treatment*; ha servido como disertante para Eisai, GlaxoSmithKline y UCB Pharma para un simposio en el European and International Epilepsy Congress (para participar en comités o simposios); y ha recibido apoyo financiero en la forma de una European FP7 grant (EURIPIDES) y programa de fondos para becas/investigación de entidades nacionales (francesas), incluyendo 2 PHRC (Programme Hospitalier de Recherche Clinique), 1 INSERM-DHOS (Institut National de la Santé et de la Recherche Médicale-Direction de l'Hospitalisation et de l'Organisation des Soins) Translational, and 1 Contrat d'Interface INSERM. Ir a [Neurology.org](http://Neurology.org) para declaraciones completas.

Recibido el 24 de junio de 2016. Aceptado en su formato final el 2 de noviembre de 2016.

## BIBLIOGRAFÍA

1. American Academy of Neurology. Clinical Practice Guideline Process Manual, 2004 ed. [online]. St. Paul: The American Academy of Neurology. Available at: [aan.com/Guidelines/Home/Development](http://aan.com/Guidelines/Home/Development). Accessed March 1, 2010.
2. American Academy of Neurology. Clinical Practice Guideline Process Manual, 2011 ed. [online]. St. Paul: The American Academy of Neurology. Available at: [aan.com/Guidelines/Home/Development](http://aan.com/Guidelines/Home/Development). Accessed March 1, 2010.
3. Nashef L. Sudden unexpected death in epilepsy: terminology and definitions. *Epilepsia* 1997;38(11 suppl):S6-S8.
4. Annegers JF. United States perspective on definitions and classifications. *Epilepsia* 1997;38(11 suppl):S9-S12.
5. Leestma JE, Annegers JF, Brodie MJ, et al. Sudden unexplained death in epilepsy: observations from a large clinical development program. *Epilepsia* 1997;38:47-55.
6. Tennis P, Cole TB, Annegers JF, Leestma JE, McNutt M, Rajput A. Cohort study of incidence of sudden unexplained death in persons with seizure disorder treated with antiepileptic drugs in Saskatchewan, Canada. *Epilepsia* 1995;36:29-36.
7. Derby LE, Tennis P, Jick H. Sudden unexplained death among subjects with refractory epilepsy. *Epilepsia* 1996; 37:931-935.
8. Langan Y, Nolan N, Hutchinson M. The incidence of sudden unexpected death in epilepsy (SUDEP) in South Dublin and Wicklow. *Seizure* 1998;7:355-358.
9. Langan Y, Nashef L, Sander JW. Certification of deaths attributable to epilepsy. *J Neurol Neurosurg Psychiatry* 2002;73:751-752.
10. Edey S, Moran N, Nashef L. SUDEP and epilepsy-related mortality in pregnancy. *Epilepsia* 2014;55:e72-e74.
11. Ackers R, Besag FM, Hughes E, Squier W, Murray ML, Wong IC. Mortality rates and causes of death in children with epilepsy prescribed antiepileptic drugs: a retrospective cohort study using the UK General Practice Research Database. *Drug Saf* 2011;34:403-413.
12. Berg AT, Nickels K, Wirrell EC, et al. Mortality risks in new-onset childhood epilepsy. *Pediatrics* 2013;132: 124-131.
13. Nickels KC, Grossardt BR, Wirrell EC. Epilepsy-related mortality is low in children: a 30-year population-based study in Olmsted County, MN. *Epilepsia* 2012;53: 2164-2171.
14. Sillanpää M, Shinnar S. SUDEP and other causes of mortality in childhood-onset epilepsy. *Epilepsy Behav* 2013; 28:249-255.
15. Lhatoo SD, Johnson AL, Goodridge DM, MacDonald BK, Sander JW, Shorvon SD. Mortality in epilepsy in the first 11 to 14 years after diagnosis: multivariate analysis of a long-term, prospective, population-based cohort. *Ann Neurol* 2001;49:336-344.
16. Holst AG, Winkel BG, Risgaard B, et al. Epilepsy and risk of death and sudden unexpected death in the young: a nationwide study. *Epilepsia* 2013;54:1613-1620.
17. Aurlen D, Larsen JP, Gjerstad L, Taubøll E. Comorbid and underlying diseases: major determinants of excess mortality in epilepsy. *Seizure* 2012;21:573-577.
18. Xu Z, Ayyappan S, Seneviratne U. Sudden unexpected death in epilepsy (SUDEP): what do patients think? *Epilepsy Behav* 2015;42:29-34.
19. Knapp P, Raynor DK, Berry DC. Comparison of two methods of presenting risk information to patients about the side effects of medicine. *Qual Saf Health Care* 2004; 13:176-180.
20. Kahneman D, Tversky A. Choices, values, and frames. *Am Psychol* 1984;39:341-350.
21. Bonner C, Newell BR. How to make a risk seem riskier: the ratio bias versus construal level theory. *Judgment Decis Making* 2008;3:411-416.
22. Sillanpää M, Shinnar S. Long-term mortality in childhood-onset epilepsy. *N Engl J Med* 2010;363:2522-2529.
23. Racosin JA, Feeney J, Burkhart G, Boehm G. Mortality in antiepileptic drug development programs. *Neurology* 2001;56:514-519.
24. Ryvlin P, Cucherat M, Rheims S. Risk of sudden unexpected death in epilepsy in patients given adjunctive antiepileptic treatment for refractory seizures: a meta-analysis of placebo-controlled randomised trials. *Lancet Neurol* 2011;10:961-968.
25. Tomson T, Hirsch LJ, Friedman D, et al. Sudden unexpected death in epilepsy in lamotrigine randomized-controlled trials. *Epilepsia* 2013;54:135-140.
26. Granbichler CA, Nashef L, Selway R, Polkey CE. Mortality and SUDEP in epilepsy patients treated with vagus nerve stimulation. *Epilepsia* 2015;56:291-296.
27. Langan Y, Nashef L, Sander JW. Case-control study of SUDEP. *Neurology* 2005;64:1131-1133.
28. Walczak TS, Leppik IE, D'Amelio M, et al. Incidence and risk factors in sudden unexpected death in epilepsy: a prospective cohort study. *Neurology* 2001;56: 519-525.
29. Hesdorffer DC, Tomson T, Benn E, et al; ILAE Commission on Epidemiology; Subcommission on Mortality. Combined analysis of risk factors for SUDEP. *Epilepsia* 2011;52:1150-1159.
30. Surges R, Adjei P, Kallis C, et al. Pathologic cardiac repolarization in pharmacoresistant epilepsy and its potential role in sudden unexpected death in epilepsy: a case-control study. *Epilepsia* 2010;51:233-242.
31. Hitiris N, Suratman S, Kelly K, Stephen LJ, Sills GJ, Brodie MJ. Sudden unexpected death in epilepsy: a search for risk factors. *Epilepsy Behav* 2007;10:138-141.

32. Lhatoo SD, Faulkner HJ, Dembny K, Trippick K, Johnson C, Bird JM. An electroclinical case-control study of sudden unexpected death in epilepsy. *Ann Neurol* 2010;68:787–796.
33. Nilsson L, Farahmand BY, Persson PG, Thiblin I, Tomson T. Risk factors for sudden unexpected death in epilepsy: a case-control study. *Lancet* 1999;353:888–893.
34. Hesdorffer DC, Tomson T, Benn E, et al; ILAE Commission on Epidemiology (Subcommission on Mortality). Do antiepileptic drugs or generalized tonic-clonic seizure frequency increase SUDEP risk? A combined analysis. *Epilepsia* 2012;53:249–252.
35. Lamberts RJ, Thijs RD, Laffan A, Langan Y, Sander JW. Sudden unexpected death in epilepsy: people with nocturnal seizures may be at highest risk. *Epilepsia* 2012; 53:253–257.
36. Annegers JF, Coan SP, Hauser WA, Leestma J. Epilepsy, vagal nerve stimulation by the NCP system, all-cause mortality, and sudden, unexpected, unexplained death. *Epilepsia* 2000;41:549–553.
37. Nilsson L, Bergman U, Diwan V, Farahmand BY, Persson PG, Tomson T. Antiepileptic drug therapy and its management in sudden unexpected death in epilepsy: a case-control study. *Epilepsia* 2001;42:667–673.
38. Surges R, Strzelczyk A, Scott CA, Walker MC, Sander JW. Postictal generalized electroencephalographic suppression is associated with generalized seizures. *Epilepsy Behav* 2011;21:271–274.
39. Ryvlin P, Nashef L, Lhatoo SD, et al. Incidence and mechanisms of cardiorespiratory arrests in epilepsy monitoring units (MORTEMUS): a retrospective study. *Lancet Neurol* 2013;12:966–977.
40. Buck D, Jacoby A, Baker GA, Chadwick DW. Factors influencing compliance with antiepileptic drug regimes. *Seizure* 1997;6:87–93.
